# Supplementary material for: The association between rheumatoid arthritis and reduced estimated cardiorespiratory fitness is mediated by physical symptoms and negative emotions: a cross-sectional study
Source: Springer Nature journal article supplement (doi:10.1007/s10067-023-06584-x), 2023-03-24
Supplement: MOESM1 [file 24671916]

## Online Resource Table S1

Article: The association between rheumatoid arthritis and reduced estimated cardiorespiratory fitness is mediated by physical symptoms and negative emotions: a cross-sectional study

Journal: Clinical Rheumatology.

Authors: Ingrid Sæther Houge, Mari Hoff, Vibeke Videm

Corresponding author: Professor Vibeke Videm MD PhD, Department of Clinical and Molecular Medicine, Lab Centre 3 East

St. Olavs hospital, NO-7006 Trondheim, Norway, Tel: +47 72 57 33 21, e-mail: [vibeke.videm@ntnu.no](mailto:vibeke.videm@ntnu.no)

### Online Resource Table S1: Detailed results from Structural Equation Model 1 <sup>a,b</sup>

|                                | Unstandardized coefficients (95% confidence interval) |                      |                        | Standardized coefficients |                 |              |
|--------------------------------|-------------------------------------------------------|----------------------|------------------------|---------------------------|-----------------|--------------|
|                                | Direct effect                                         | Indirect effect      | Total effect           | Direct effect             | Indirect effect | Total effect |
| Effect on eCRF                 |                                                       |                      |                        |                           |                 |              |
| Rheumatoid arthritis           | -1.70 (-2.79, -0.61)*                                 | -                    | -1.70 (-2.79, -0.61)*  | -0.089*                   | -               | -0.089*      |
| Male sex                       | 9.45 (8.51, 10.38)*                                   | 0.25 (0.05, 0.46)†   | 9.70 (8.76, 10.63)*    | 0.488*                    | 0.013†          | 0.501*       |
| Age                            | -0.38 (-0.42, -0.35)*                                 | -0.03 (-0.05,-0.01)* | -0.41 (-0.44, -0,38)*  | -0.645*                   | -0.046*         | -0.691*      |
| Effect on rheumatoid arthritis |                                                       |                      |                        |                           |                 |              |
| Male sex                       | -0.15 (-0.22, - 0.08)*                                | -                    | -0.15 (-0.22, - 0.08)* | -0.148*                   | -               | -0.148*      |
| Age                            | 0.02 (0.01, 0.02)*                                    | -                    | 0.02 (0.01, 0.02)*     | 0.516*                    | -               | 0.516*       |

<sup>a</sup>Abbreviations: eCRF estimated cardiorespiratory fitness. †<0.05, \*<0.01.

<sup>b</sup>Model 1: The effect of rheumatoid arthritis status on estimated cardiorespiratory fitness in a model adjusted for age and sex.
