# Supplementary material for: The association between rheumatoid arthritis and reduced estimated cardiorespiratory fitness is mediated by physical symptoms and negative emotions: a cross-sectional study
Source: Springer Nature journal article supplement (doi:10.1007/s10067-023-06584-x), 2023-03-24
Supplement: MOESM2 [file 24671916]

## Online Resource Table S2

Article: The association between rheumatoid arthritis and reduced estimated cardiorespiratory fitness is mediated by physical symptoms and negative emotions: a cross-sectional study

Journal: Clinical Rheumatology.

Authors: Ingrid Sæther Houge, Mari Hoff, Vibeke Videm

Corresponding author: Professor Vibeke Videm MD PhD

Department of Clinical and Molecular Medicine, Lab Centre 3 East

St. Olavs hospital, NO-7006 Trondheim, Norway

Tel: +47 72 57 33 21, e-mail: [vibeke.videm@ntnu.no](mailto:vibeke.videm@ntnu.no)

**Online Resource Table S2: Detailed results from Structural Equation Model 2a <sup>a,b</sup>**

|                                      | Unstandardized coefficients (95% confidence interval) |                       |                       | Standardized coefficients |                 |              |
|--------------------------------------|-------------------------------------------------------|-----------------------|-----------------------|---------------------------|-----------------|--------------|
|                                      | Direct effect                                         | Indirect effect       | Total effect          | Direct effect             | Indirect effect | Total effect |
| Effect on eCRF                       |                                                       |                       |                       |                           |                 |              |
| Rheumatoid arthritis                 | -0.87 (-2.03, 0.30)                                   | -0.81 (-1.33, -0.29)* | -1.68 (-2.77, -0.59)* | -0.045                    | -0.042*         | -0.087*      |
| Male sex                             | 9.26 (8.34, 10.19)*                                   | 0.25 (0.05, 0.45)†    | 9.51 (8.59, 10.43)*   | 0.480*                    | 0.013†          | 0.493*       |
| Age                                  | -0.38 (-0.41, -0.35)*                                 | -0.03 (-0.05, -0.01)* | -0.41 (-0.44, -0.38)* | -0.640*                   | -0.055*         | -0.695*      |
| Physical symptoms                    | 1 (constrained)                                       | -                     | 1 (constrained)       | 0.095*                    | -               | 0.095*       |
| Effect on rheumatoid arthritis       |                                                       |                       |                       |                           |                 |              |
| Male sex                             | -0.15 (-0.22, -0.08)*                                 | -                     | -0.15 (-0.22, -0.08)* | -0.148*                   | -               | -0.148*      |
| Age                                  | 0.02 (0.01, 0.02)*                                    | -                     | 0.02 (0.01, 0.02)*    | 0.516*                    | -               | 0.516*       |
| Effect on physical symptoms          |                                                       |                       |                       |                           |                 |              |
| Rheumatoid arthritis                 | -0.81 (-1.33, -0.29)*                                 | -                     | -0.81 (-1.33, -0.29)* | -0.444*                   | -               | -0.444*      |
| Male sex                             | -                                                     | 0.12 (0.02, 0.22)†    | 0.12 (0.02, 0.22)†    | -                         | 0.066†          | 0.066†       |
| Age                                  | -0.01 (-0.01, 0.00)                                   | -0.01 (-0.02, 0.00)*  | -0.02 (-0.03, -0.01)* | -0.099                    | -0.229*         | -0.328*      |
| Effect on joint pain past six months |                                                       |                       |                       |                           |                 |              |
| Rheumatoid arthritis                 | -                                                     | 2.42 (1.94, 2.91)*    | 2.42 (1.94, 2.91)*    | -                         | 0.423*          | 0.423*       |
| Physical symptoms                    | -2.99 (-4.83, -1.15)*                                 | -                     | -2.99 (-4.83, -1.15)* | -0.952*                   | -               | -0.952*      |
| Sex                                  | -                                                     | -0.36 (-0.55, -0.17)* | -0.36 (-0.55, -0.17)* | -                         | -0.062*         | -0.062*      |
| Age                                  | -                                                     | 0.06 (0.04, 0.07)*    | 0.06 (0.04, 0.07)*    | -                         | 0.313*          | 0.313*       |
| Effect on morning stiffness          |                                                       |                       |                       |                           |                 |              |
| Rheumatoid arthritis                 | -                                                     | 2.26 (1.81, 2.71)*    | 2.26 (1.81, 2.71)*    | -                         | 0.399*          | 0.399*       |
| Physical symptoms                    | -2.79 (-4.51, -1.08)*                                 | -                     | -2.79 (-4.51, -1.08)* | -0.899*                   | -               | -0.899*      |
| Male sex                             | -                                                     | -0.34 (-0.51, -0.16)* | -0.34 (-0.51, -0.16)* | -                         | -0.060*         | -0.060*      |
| Age                                  | -                                                     | 0.05 (0.04, 0.06)*    | 0.05 (0.04, 0.06)*    | -                         | 0.295*          | 0.295*       |
| Effect on pain in neck/back/hips     |                                                       |                       |                       |                           |                 |              |
| Rheumatoid arthritis                 | -                                                     | 1.71 (1.22, 2.19)*    | 1.71 (1.22, 2.19)*    | -                         | 0.287*          | 0.287*       |
| Physical symptoms                    | -2.11 (-3.33, -0.89)*                                 | -                     | -2.11 (-3.33, -0.89)* | -0.647*                   | -               | -0.647*      |
| Male sex                             | -                                                     | -0.25 (-0.40, -0.11)* | -0.25 (-0.40, -0.11)* | -                         | -0.042*         | -0.042*      |
| Age                                  | -                                                     | 0.04 (0.03, 0.05)*    | 0.04 (0.03, 0.05)*    | -                         | 0.212*          | 0.212*       |

<sup>a</sup>Abbreviations: eCRF estimated cardiorespiratory fitness. †<0.05. \*<0.01.

<sup>b</sup>Model 2a: The effect of rheumatoid arthritis status on estimated cardiorespiratory fitness, directly and indirectly through physical symptoms, in a model adjusted for age and sex.
