# Supplementary material for: The association between rheumatoid arthritis and reduced estimated cardiorespiratory fitness is mediated by physical symptoms and negative emotions: a cross-sectional study
Source: Springer Nature journal article supplement (doi:10.1007/s10067-023-06584-x), 2023-03-24
Supplement: MOESM5 [file 24671916]

## Online Resource Table S5

Article: The association between rheumatoid arthritis and reduced estimated cardiorespiratory fitness is mediated by physical symptoms and negative emotions: a cross-sectional study

Journal: Clinical Rheumatology.

Authors: Ingrid Sæther Houge, Mari Hoff, Vibeke Videm

Corresponding author: Professor Vibeke Videm MD PhD

Department of Clinical and Molecular Medicine, Lab Centre 3 East

St. Olavs hospital, NO-7006 Trondheim, Norway

Tel: +47 72 57 33 21, e-mail: [vibeke.videm@ntnu.no](mailto:vibeke.videm@ntnu.no)

### Online Resource Table S5: Model fit indices for the structural equation models <sup>a</sup>

|          | <b>P-value for the<br/>chi-square test</b> | <b>Root mean<br/>square error of<br/>approximation</b> | <b>Comparative fit<br/>index</b> | <b>Tucker Lewis<br/>Index</b> |
|----------|--------------------------------------------|--------------------------------------------------------|----------------------------------|-------------------------------|
| Model 1  | Not applicable                             | <0.001                                                 | 1.000                            | 1.000                         |
| Model 2a | 0.15                                       | 0.032                                                  | 0.998                            | 0.993                         |
| Model 2b | 0.25                                       | 0.026                                                  | 0.999                            | 0.995                         |
| Model 3  | 0.047                                      | 0.037                                                  | 0.995                            | 0.987                         |

<sup>a</sup>Model 1: The effect of rheumatoid arthritis status on estimated cardiorespiratory fitness. Model 2a: The effect of rheumatoid arthritis status on estimated cardiorespiratory fitness, directly and indirectly through physical symptoms. Model 2b: The effect of rheumatoid arthritis status on estimated cardiorespiratory fitness, directly and indirectly through negative emotions. Model 3: The effect of rheumatoid arthritis status on estimated cardiorespiratory fitness, directly and indirectly through physical symptoms and negative emotions. All models were adjusted for age and sex.
